# Supplementary material
Source: PubMed Central journal article supplement (PMC3190824)

Supplementary Materials

Table S1. X-ray data collection and refinement statistics

|                                     | Apo-casp2                                     | Casp2/<br>VDVAD                               | Casp2/<br>ADVAD                               | Casp2/<br>DVAD <sup>d</sup>                   | Casp2/<br>DVAD <sup>e</sup>                   | T380A/<br>VDVAD                               |
|-------------------------------------|-----------------------------------------------|-----------------------------------------------|-----------------------------------------------|-----------------------------------------------|-----------------------------------------------|-----------------------------------------------|
| Data collection statistics          |                                               |                                               |                                               |                                               |                                               |                                               |
| Wavelength (Å)                      | 1.11                                          | 1.11                                          | 1.11                                          | 1.11                                          | 1.11                                          | 1.11                                          |
| Resolution (Å)                      | 2.24                                          | 2.07                                          | 1.77                                          | 2.33                                          | 1.80                                          | 1.90                                          |
| Reflection<br>(observed/unique)     | 240485/<br>33253                              | 267526/<br>37412                              | 429434/<br>59418                              | 189720/<br>26321                              | 404978/<br>55954                              | 345933/<br>47911                              |
| Completeness (%)                    | 100(100)                                      | 100(100)                                      | 99.8(100)                                     | 100(100)                                      | 99.9(100)                                     | 100(100)                                      |
| Redundancy                          | 7.2(7.3)                                      | 7.2(7.2)                                      | 7.2(7.2)                                      | 7.2(7.2)                                      | 7.2(7.3)                                      | 7.2(7.3)                                      |
| I/σ(I)                              | 41.2(5.51)                                    | 25.4(5.23)                                    | 55.9(6.32)                                    | 37.8(10.0)                                    | 49.2(8.35)                                    | 39.1(7.93)                                    |
| R <sub>merge</sub> <sup>a</sup>     | 0.50(0.10)                                    | 0.55(0.17)                                    | 0.50(0.089)                                   | 0.32(0.120)                                   | 0.48(0.10)                                    | 0.43(0.11)                                    |
| Refinement Statistics               |                                               |                                               |                                               |                                               |                                               |                                               |
| Space group                         | P2 <sub>1</sub> 2 <sub>1</sub> 2 <sub>1</sub> |
| Unit cell parameters                | a=74.16<br>b=82.80<br>c=112.00                | a=63.32<br>b=97.69<br>c=96.85                 | a=62.92<br>b=96.62<br>c=97.97                 | a=62.87<br>b=95.86<br>c=98.14                 | a=63.00<br>b=96.86<br>c=97.93                 | a=62.91<br>b=97.06<br>c=98.25                 |
| Monomers per A.U.                   | 2                                             | 2                                             | 2                                             | 2                                             | 2                                             | 2                                             |
| Protein atoms                       | 4045                                          | 4143                                          | 4114                                          | 4103                                          | 4076                                          | 4132                                          |
| Water molecules                     | 132                                           | 315                                           | 244                                           | 208                                           | 307                                           | 291                                           |
| R <sub>free</sub> <sup>b</sup> (%)  | 0.23                                          | 0.21                                          | 0.21                                          | 0.23                                          | 0.21                                          | 0.20                                          |
| R <sub>cryst</sub> <sup>c</sup> (%) | 0.19                                          | 0.16                                          | 0.18                                          | 0.17                                          | 0.17                                          | 0.18                                          |
| Bonds (Å)                           | 0.024                                         | 0.023                                         | 0.017                                         | 0.022                                         | 0.017                                         | 0.014                                         |
| Angles (°)                          | 2.0                                           | 1.8                                           | 1.6                                           | 1.8                                           | 1.7                                           | 1.4                                           |
| Favored                             | 99.3                                          | 98.9                                          | 99.6                                          | 97.0                                          | 99.8                                          | 99.8                                          |
| Generously allowed                  | 0.7                                           | 1.1                                           | 0.4                                           | 3.0                                           | 0.2                                           | 0.2                                           |
| Disallowed                          | 0                                             | 0.2                                           | 0                                             | 0                                             | 0                                             | 0                                             |

<sup>a</sup> R<sub>merge</sub> =  $\sum |I_o - \langle I \rangle| / \sum \langle I \rangle$  summed over all observations and reflections.

<sup>b</sup> R<sub>free</sub> = R<sub>cryst</sub> calculated for 5% of reflections omitted from the refinement.

<sup>c</sup> R<sub>cryst</sub> =  $\sum |F_o - F_c| / \sum |F_o|$ .

<sup>d</sup> high Ac-DVAD-CHO concentration structure.

<sup>e</sup> low Ac-DVAD-CHO concentration structure.

Figure S1. A) The mass spectrum, and B) the SDS-PAGE of purified wild type caspase-2.

A.

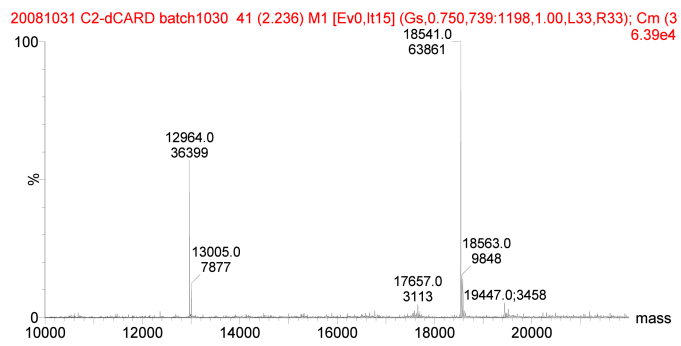

B.

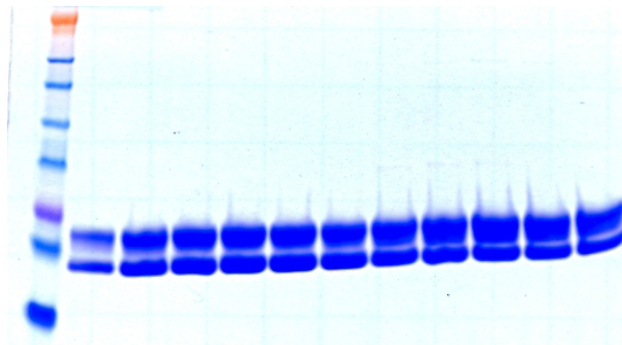

Figure S2. The electron density map of peptide inhibitors. The  $2F_o-F_c$  map is contoured at  $\sigma=1$ . Color scheme same as in Figure 1. Only the low concentration structure of Casp2/DVAD is shown here.

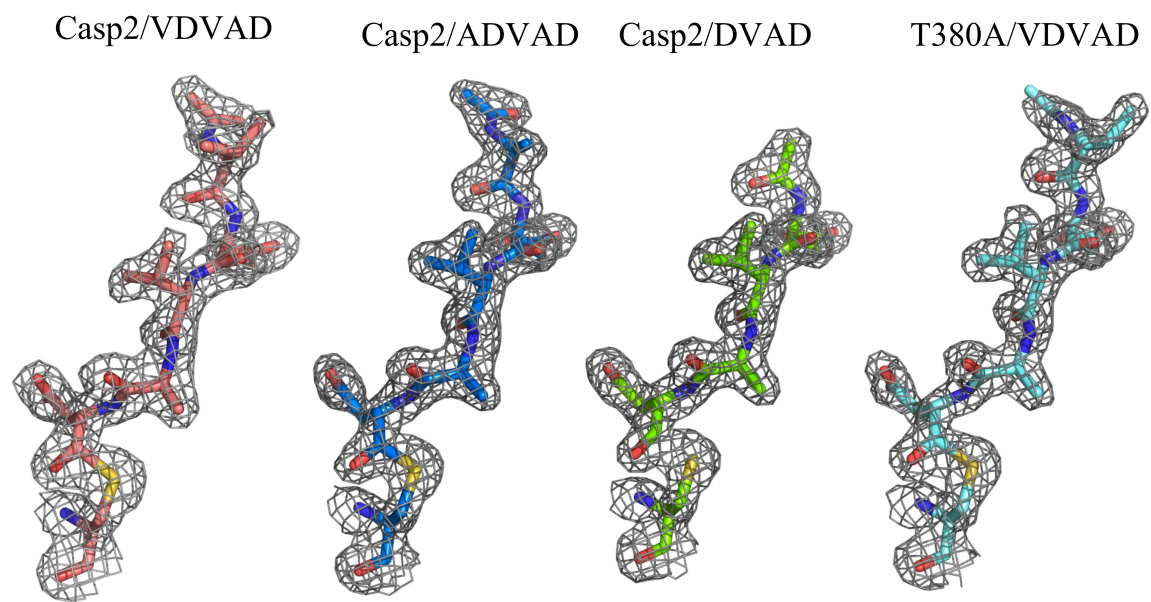

Figure S3. Schematic diagrams of caspase-2 interactions with peptide inhibitors. Only the low concentration structure of Casp2/DVAD is shown here. Backbone hydrogen bonds are shown in black dotted lines, main chain hydrogen bonds are shown in red dotted lines. Hydrophobic interactions are shown in wavy lines. The P5 residue and its interacting residues are shown in magenta. A) Casp2/ADVAD; B) Casp2/DVAD; C) T380A/VDVAD

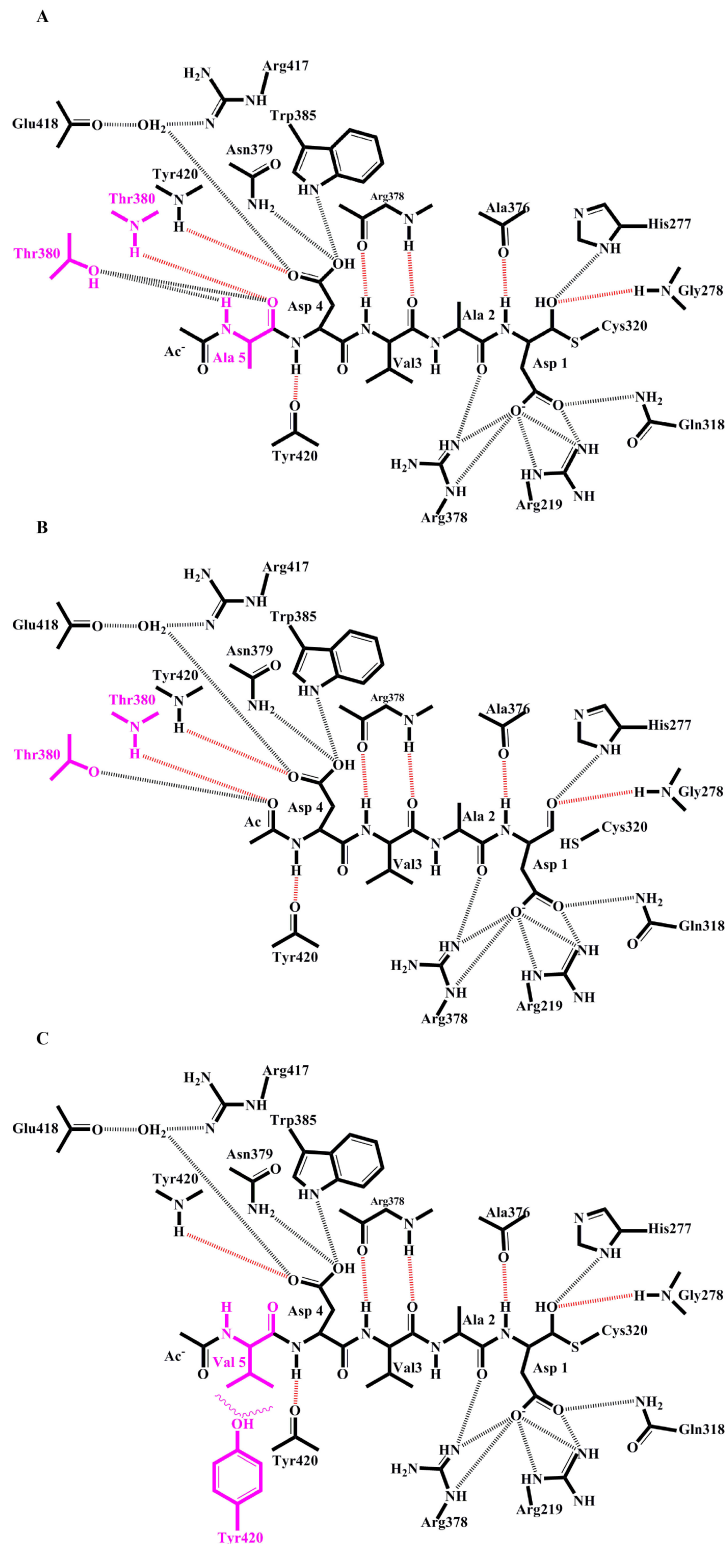

Figure S4. The Hill Coefficient of caspase-2 is 1.0.

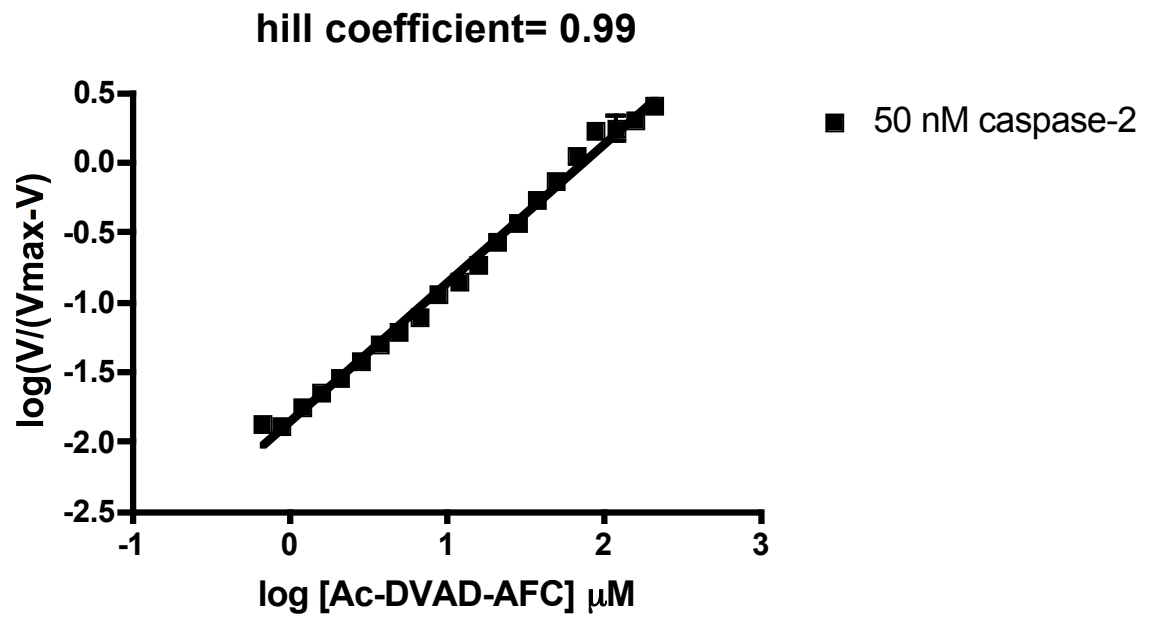

Supplement: supp_M111.247627_jbc.M111.247627-1.pdf [file supp_M111.247627_jbc.M111.247627-1.pdf]
